# Supplementary material for: Opening the doors of precision medicine: novel tools to assess intestinal barrier in inflammatory bowel disease and colitis-associated neoplasia
Source: HighWire-hosted journal article supplement (doi:10.1136/gutjnl-2023-331579), 2024-06-08

# Opening The Doors Of Precision Medicine: Novel Tools To Assess Intestinal Barrier In Inflammatory Bowel Disease And Colitis-Associated Neoplasia

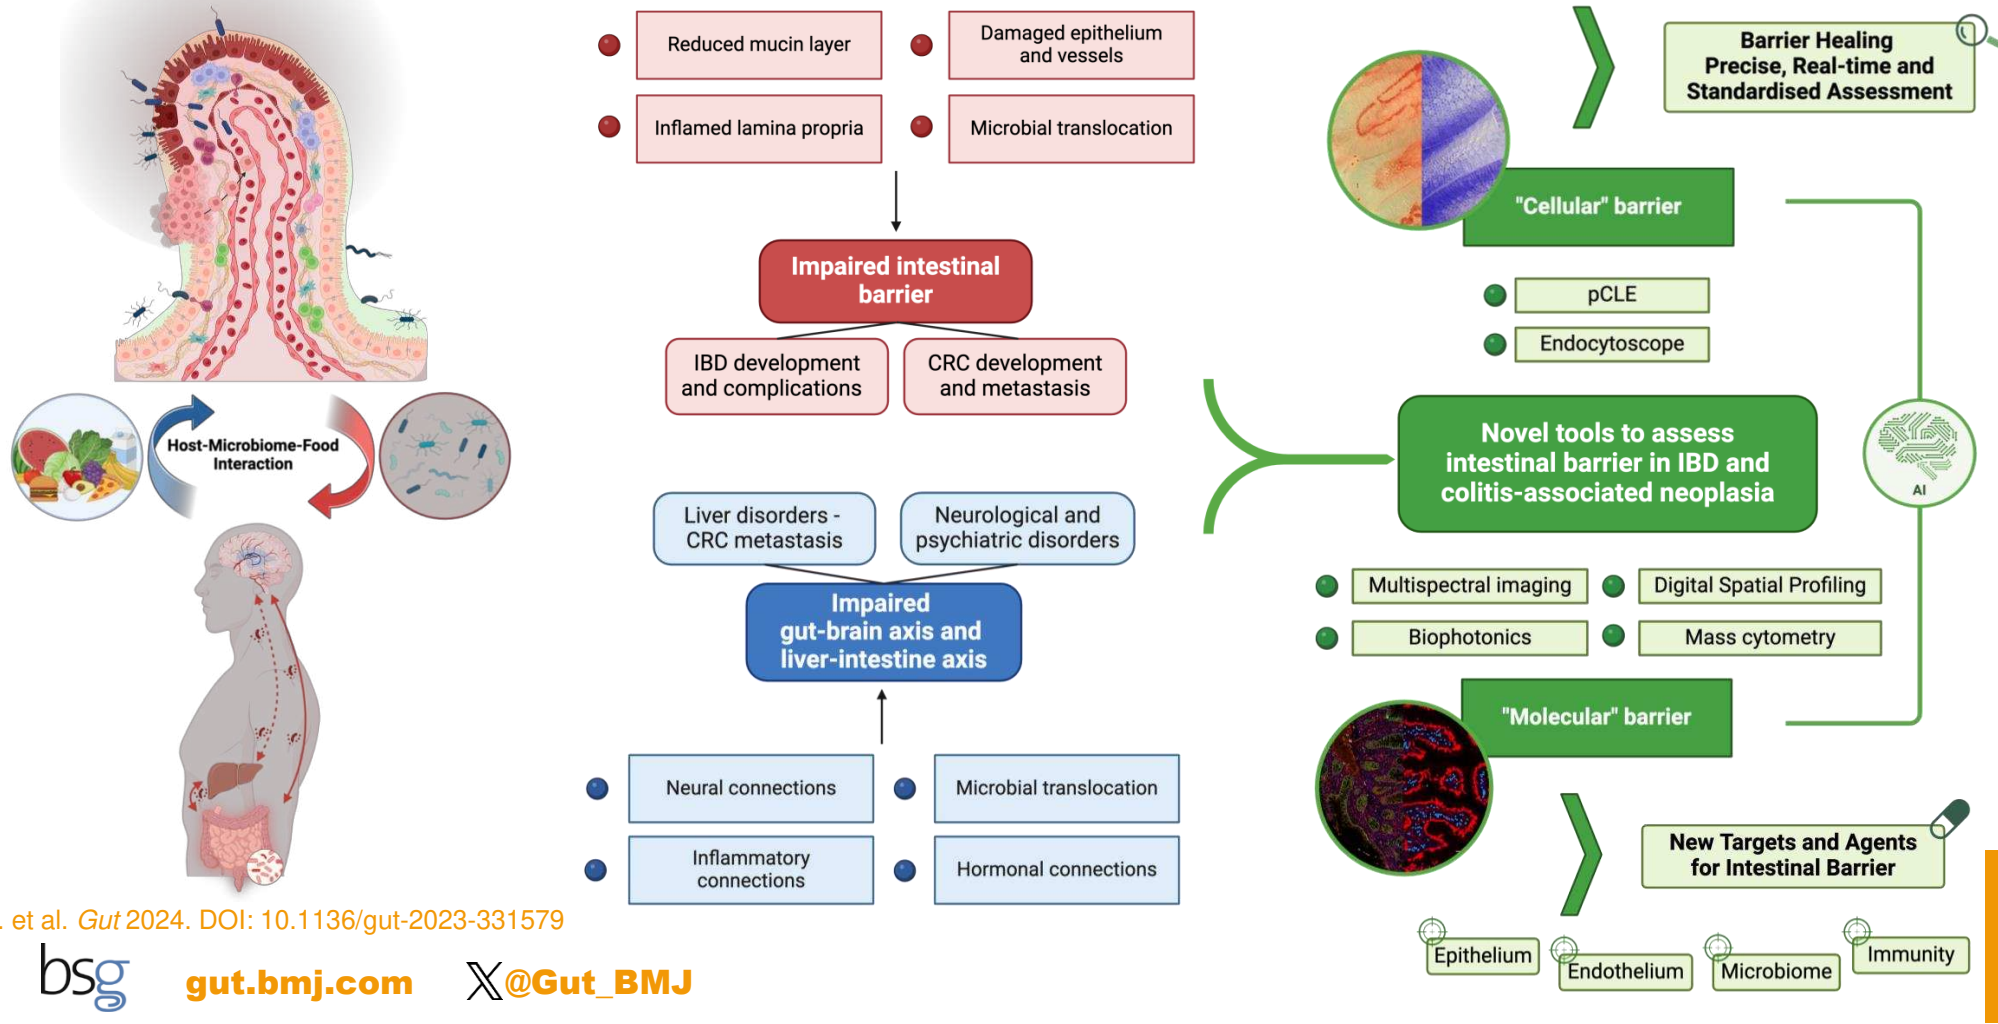

Iacucci, M. et al. *Gut* 2024. DOI: 10.1136/gut-2023-331579

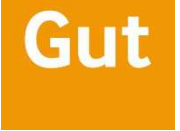

Supplement: gutjnl-2023-331579supp001_data_supplement.pdf [file gutjnl-2023-331579supp001_data_supplement.pdf]
